# Supplementary material for: Improving Safety Among Pregnant Women Reporting Domestic Violence in Nepal—A Pilot Study
Source: MDPI journal article supplement (doi:10.3390/ijerph17072268), 2020-03-27
Supplement: s1 [file s1]

**Table S1.** Original and modified safety-promoting behavior checklist.

| <b>Safety-Promoting Behavior Checklist</b><br><b>Ask the Women to Answer “Yes”, “No” or “Not Applicable”</b>                                                                                                                                                                                                                                                     |                                                                                                                                                                                                                                                                                                                                                                                                                                                 |     |    |                |
|------------------------------------------------------------------------------------------------------------------------------------------------------------------------------------------------------------------------------------------------------------------------------------------------------------------------------------------------------------------|-------------------------------------------------------------------------------------------------------------------------------------------------------------------------------------------------------------------------------------------------------------------------------------------------------------------------------------------------------------------------------------------------------------------------------------------------|-----|----|----------------|
| Original text                                                                                                                                                                                                                                                                                                                                                    | Modified text                                                                                                                                                                                                                                                                                                                                                                                                                                   | Yes | No | Not applicable |
| Have you ever<br>Hid money<br>Hid an extra set of<br>house and/or car keys<br>Established code with<br>family or friends<br>Asked neighbors to call<br>the police if violence<br>begins<br>Removed weapons                                                                                                                                                       | Have you ever<br>Hid money<br>Hid important keys (important keys means house keys, car keys or<br>any other vehicle keys)<br>Established code with family and friends (established code means<br>made agreements with friends and family such as a hidden message<br>when violence begins and you need help)<br>Asked neighbors to call the police if violence begins<br>Removed weapons (hidden or removed weapons like knives, guns,<br>etc.) |     |    |                |
| Have you ever made<br>available<br>Social security number<br>(yours, his, children)<br>Rent and utility receipts<br>Birth certificates (yours<br>and children)<br>ID or driver’s license<br>Bank account numbers<br>Insurance policies and<br>numbers<br>Marriage license<br>Valuable jewelry<br>Important phone<br>numbers<br>Hidden bag with extra<br>clothing | Have you ever made available<br>Birth certificates (your birth certificate and your children’s birth<br>certificates)<br>Bank account numbers<br>Citizenship card<br>Driver’s license<br>Marriage license/certificates<br>Valuable jewelry/ies and the bills<br>Important phone number/s<br>Hidden bag with extra clothing<br>Address for safe house/shelter<br>Extra mobile sim card                                                           |     |    |                |

**Table S2.** Characteristics at baseline for women who participated in follow-up and those lost to follow-up,  $N = 181$ .

| Characteristics                        |                            |           | Follow-up     |                  | <i>p</i> -value |
|----------------------------------------|----------------------------|-----------|---------------|------------------|-----------------|
|                                        |                            |           | Participants  | Non-participants |                 |
|                                        |                            |           | <i>N</i> = 62 | <i>N</i> = 119   |                 |
|                                        |                            |           | <i>n</i> (%)  | <i>n</i> (%)     |                 |
| Women’s characteristics                |                            |           |               |                  |                 |
| Age in years                           | 15–19                      |           | 4 (6.5)       | 9 (7.6)          | 0.145           |
|                                        | 20–24                      |           | 33 (53.2)     | 64 (53.8)        |                 |
|                                        | 25–29                      |           | 13 (21.0)     | 36 (30.3)        |                 |
|                                        | ≥30                        |           | 12 (19.4)     | 10 (8.4)         |                 |
| Education                              | No                         |           | 8 (12.9)      | 25 (21.0)        | 0.561           |
|                                        | Primary                    |           | 10 (16.1)     | 19 (16.0)        |                 |
|                                        | Secondary                  |           | 17 (27.4)     | 32 (26.9)        |                 |
|                                        | Higher secondary and above |           | 27 (43.5)     | 43 (36.1)        |                 |
| Income                                 | No income                  |           | 47 (75.8)     | 94 (79.0)        | 0.258           |
|                                        | Income no autonomy         |           | 3 (4.8)       | 11 (9.2)         |                 |
|                                        | Income and autonomy        |           | 12 (19.4)     | 14 (11.8)        |                 |
| Parity                                 | Nulliparous                |           | 24 (38.7)     | 61 (51.3)        | 0.073           |
|                                        | Multiparous                |           | 38 (61.3)     | 58 (48.7)        |                 |
| Gestational weeks at baseline in weeks |                            | Mean ± SD | 21.40±4.42    | 20.64±11.37      |                 |
| Husband’s characteristics              |                            |           |               |                  |                 |
| Age in years                           | ≤24                        |           | 6 (10.2)      | 30 (26.3)        | 0.025           |
|                                        | 25–29                      |           | 21 (35.6)     | 45 (39.5)        |                 |
|                                        | 30–34                      |           | 18 (30.5)     | 25 (21.9)        |                 |
|                                        | ≥35                        |           | 14 (23.7)     | 14 (12.3)        |                 |
| Education                              | No                         |           | 7 (11.7)      | 12 (10.5)        | 0.838           |
|                                        | Primary                    |           | 8 (13.3)      | 21 (18.4)        |                 |
|                                        | Secondary                  |           | 17 (28.3)     | 33 (28.9)        |                 |
|                                        | Higher secondary and above |           | 28 (46.7)     | 48 (42.1)        |                 |
| Family/community characteristics       |                            |           |               |                  |                 |
| Family structure                       | Nuclear                    |           | 36 (63.2)     | 58 (51.8)        | 0.191           |
|                                        | Extended                   |           | 21 (36.8)     | 54 (48.2)        |                 |
| Geographical setting                   | Rural                      |           | 9 (14.5)      | 7 (5.9)          | 0.094           |
|                                        | Urban                      |           | 53 (85.5)     | 112 (94.1)       |                 |
| Caste/ethnicity                        | Dalit                      |           |               | 3 (3.7)          | 0.086           |
|                                        | Disadvantaged Janajati     |           | 18 (34.0)     | 14 (17.3)        |                 |
|                                        | Advantaged Janajati        |           | 8 (15.1)      | 17 (21.0)        |                 |
|                                        | Upper caste                |           | 27 (50.9)     | 47 (58.0)        |                 |
| Baseline anxiety and depression        |                            | ≤2 score  | 16 (25.8)     | 39 (32.8)        | 0.396           |
|                                        |                            | >2 score  | 46 (74.2)     | 80 (67.2)        |                 |
| Reported violence at baseline          | Fear only                  |           | 40 (64.5)     | 69 (58.0)        | 0.155           |
|                                        | Violence only              |           | 14 (22.6)     | 21 (17.6)        |                 |
|                                        | Both violence and fear     |           | 8 (12.9)      | 26 (24.4)        |                 |
| Earthquake status                      | Before                     |           | 28 (45.2)     | 66 (55.5)        | 0.212           |
|                                        | After                      |           | 34 (54.8)     | 53 (44.5)        |                 |

**Table S3.** Safety measures practiced\* at baseline by women who reported DV, *N* = 181.

|                                           | Before<br>Earthquake <i>N</i> = 94 | After<br>Earthquake<br><i>N</i> = 87 |
|-------------------------------------------|------------------------------------|--------------------------------------|
| Safety measures                           | <i>n</i> (%)                       | <i>n</i> (%)                         |
| Had ever:                                 |                                    |                                      |
| Hid money                                 | 3 (3.2)                            | 5 (5.7)                              |
| Hid important keys                        | 3 (3.2)                            | 6 (6.9)                              |
| Established codes with family and friends | 10 (10.6)                          | 15 (17.2)                            |
| Asked neighbors to call the police        | 4 (4.3)                            | 8 (9.2)                              |
| Removed weapons                           | 5 (5.3)                            | 1 (1.1)                              |
| Had made available:                       |                                    |                                      |
| Birth certificates (yours and your child) | 16 (17.0)                          | 15 (17.2)                            |
| Bank account numbers                      | 9 (9.6)                            | 9 (10.3)                             |
| Citizenship card                          | 18 (19.1)                          | 23 (26.4)                            |
| Driver's license                          | 3 (3.2)                            | 2 (2.3)                              |
| Marriage certificates                     | 19 (20.2)                          | 24 (27.6)                            |
| Valuable jewelry with bills               | 10 (10.6)                          | 11 (12.6)                            |
| Important phone number/s                  | 9 (9.6)                            | 14 (16.1)                            |
| Hidden bag with extra clothing            | 12 (12.8)                          | 8 (9.2)                              |
| Address for safe house/shelter            | 15 (16.0)                          | 18 (20.7)                            |
| Extra sim card                            | 7 (7.4)                            | 7 (8.0)                              |
| Number of women using any safety measure  | 50 (53.2)                          | 52 (59.8)                            |

\*More than one safety measure could be used by an individual woman, resulting in more than 100% number of measures.
